# 1 Investigating olfactory behaviors in adult zebrafish

2 Florence Kermen<sup>1,2,3,4,#</sup>, Lea Darnet<sup>2,4,eq</sup>, Christoph Wiest<sup>1,eq</sup>, Fabrizio Palumbo<sup>1</sup>, Jack Bechert<sup>2,4</sup>, Ozge Uslu<sup>2,4</sup> &  
3 Emre Yaksi<sup>1,2,4,#</sup>.

## 4 Affiliations:

5 <sup>1</sup> Kavli Institute for Systems Neuroscience and Centre for Neural Computation, Faculty of Medicine and Health  
6 Sciences, Norwegian University of Science and Technology, 7030 Trondheim, Norway.

7 <sup>2</sup> Neuro-Electronics Research Flanders, Imec Campus, Kapeldreef 75, 3001 Leuven, Belgium.

8 <sup>3</sup> Department of Biology, Faculty of Natural Sciences, Norwegian University of Science and Technology, 7030  
9 Trondheim, Norway

10 <sup>4</sup> KU Leuven, 3000 Leuven, Belgium.

11 <sup>Eq</sup> equal contribution

12 # Corresponding authors: [florence.kermen@ntnu.no](mailto:florence.kermen@ntnu.no) & [emre.yaksi@ntnu.no](mailto:emre.yaksi@ntnu.no)

13 Lead contact: [emre.yaksi@ntnu.no](mailto:emre.yaksi@ntnu.no)

14

15 **Keywords:** olfaction, zebrafish, behavior, behavioral space, odor valence, inter and intra-individual variability

16

## 17 ABSTRACT

18 Odor-driven behaviors such as feeding, mating and predator avoidance are crucial for animal survival. While the  
19 zebrafish olfactory circuitry is well understood, a comprehensive description of odor-driven behaviors is needed  
20 to better relate olfactory computations to animal responses. Here, we used a medium-throughput setup to  
21 measure the swimming trajectories of 10 zebrafish in response to 17 ecologically relevant odors. By selecting  
22 appropriate locomotor metrics, we constructed ethograms systematically describing odor-induced changes in  
23 the swimming trajectory. We found that fish reacted to most odorants, using different behavioral programs and  
24 that combination of few relevant behavioral metrics enabled to capture most of the variance in these innate  
25 odor responses. We observed that monomolecular odors in similar chemical categories were weakly clustered  
26 based on the behavioral responses, likely because natural odors elicited stronger reactions than the  
27 monomolecular odors. Finally, we uncovered a previously undescribed intra and inter-individual variability of  
28 olfactory behaviors and suggest a small set of odors that elicit robust responses. In conclusion, our setup and  
29 results will be useful resources for future studies interested in characterizing olfactory responses in aquatic  
30 animals.

31

## 32 INTRODUCTION

33 Olfactory cues are powerful drivers of a wide range of behavioral responses in fish, which are related to  
34 reproduction, foraging, fear and anxiety (Hara, 1986; Keller-Costa, Canário, & Hubbard, 2015; Florence Kermen,  
35 Franco, Wyatt, & Yaksi, 2013). The neural pathways underlying these stereotyped locomotor responses have  
36 been the focus of extensive research and are well described (Derjean et al., 2010; Fore, Cosacak, Verdugo, Kizil,  
37 & Yaksi, 2019; Friedrich & Korsching, 1998; Jetti, Vendrell-Llopis, & Yaksi, 2014a; Florence Kermen & Yaksi, 2019;  
38 Koide et al., 2009; Miyasaka et al., 2014; Wakisaka et al., 2017; Yabuki et al., 2016; Yaksi, Judkewitz, & Friedrich,  
39 2007; Yaksi, von Saint Paul, Niessing, Bundschuh, & Friedrich, 2009). Odors strongly activate the reticulo-spinal  
40 cells controlling locomotion in the sea lamprey, via a circuit involving the olfactory bulb, posterior tuberculum  
41 and mesencephalic area (Derjean et al., 2010). Food-related odorants activate hypothalamic regions involved in  
42 appetite control in zebrafish (Wakisaka et al., 2017) and evoke foraging behavior in a wide range of fish species  
43 (Kaniganti et al., 2019; Koide et al., 2009; Lindsay & Vogt, 2004; Savoca, Tyson, McGill, & Slager, 2017; Wagner,  
44 Stroud, & Meckley, 2011; Wakisaka et al., 2017). Alarm cues activate regions involved in adaptive fear response  
45 that are homologous to the mammalian basolateral amygdala, septum and paraventricular nucleus of the  
46 hypothalamus (Faustino, Tacão-Monteiro, & Oliveira, 2017), and evoke anti-predatory behavior (Barreto et al.,  
47 2013a; Pfeiffer, 1963; v. Frisch, 1942; Zhao & Chivers, 2005). Thus, a precise characterization of the link between  
48 ecologically relevant olfactory cues and odor-driven behaviors is an important step towards characterizing the  
49 neural circuits generating these essential behaviors and how they are affected by animal's internal states, such  
50 as satiety, fear or anxiety. Paradoxically, while the fish olfactory circuitry is well characterized, a comprehensive

51 description of zebrafish behavior in response to ecologically relevant odors is needed to better relate olfactory  
52 computations to animal behavior.

53 A growing number of studies has begun to address this gap in knowledge by characterizing the change  
54 in zebrafish swimming patterns in response to olfactory cues, identifying clear negative (avoidance) and positive  
55 (approach) chemotactic responses (Braubach, Wood, Gadbois, Fine, & Croll, 2009; Faustino et al., 2017; Hinz et  
56 al., 2013; Hussain et al., 2013; Koide et al., 2009; Lindsay & Vogt, 2004; Mann, Turnell, Atema, & Gerlach, 2003;  
57 Mathuru et al., 2012; Vitebsky, Reyes, Sanderson, Michel, & Whitlock, 2005; Wakisaka et al., 2017; Yabuki et al.,  
58 2016). These studies gathered behavioral responses to cues belonging to one or two of the following odor  
59 categories: food-related cues (Koide et al., 2009; Wakisaka et al., 2017), social-related cues (Hinz et al., 2013;  
60 Yabuki et al., 2016), decay-related cues (Hussain et al., 2013), alarm cues (Faustino et al., 2017; Mathuru et al.,  
61 2012). This approach precludes the comparison of behavioral responses between odor categories in the same  
62 individual, which could be useful to uncover specific stereotyped motor programs. Moreover, olfactory behaviors  
63 were either measured in groups of fish (Faustino et al., 2017; Lindsay & Vogt, 2004; Yabuki et al., 2016), thus  
64 masking potential inter-individual variability in odor sensitivity or preferences, or the inter-individual variability  
65 was not specifically quantified (Hussain et al., 2013; Koide et al., 2009; Mathuru et al., 2012; Vitebsky et al., 2005;  
66 Wakisaka et al., 2017). Therefore, there is a need for testing behavioral responses of individual fish to a broad  
67 range of odorants spanning the natural stimulus space.

68 Here we characterize zebrafish olfactory behavior using a medium-throughput setup allowing for  
69 exposure to well-defined odor concentrations. Using this approach, the swimming trajectories of 10 fish were  
70 recorded in response to 17 ecologically relevant odors. By selecting 7 appropriate locomotor metrics, we  
71 constructed behavioral ethograms systematically describing odor-induced changes in the swimming trajectory.  
72 We found that fish reacted to most odorants, using different behavioral programs. A combination of few relevant  
73 behavioral metrics enabled to capture most of the variance in these innate odor responses. In general, odors  
74 belonging to similar categories were weakly clustered based on the behavioral responses. This was likely because  
75 natural odor extracts (food, blood, skin extract) have a tendency to elicit stronger reactions than the  
76 corresponding individual monomolecular components. Finally, we quantified intra and inter-individual variability  
77 of olfactory behaviors and suggest a small set of odors that elicit robust responses. In conclusion, both our setup  
78 and our results will be useful resources for future studies interested in characterizing olfactory responses in  
79 aquatic animals.

## 80 RESULTS

### 81 A vertical olfactory setup with precise control of olfactory cue concentration and fast switching of odors

82 To reproducibly measure fish responses to a large variety of odorants, we built a computer-controlled  
83 setup automatically recording the position of freely swimming individual fish (**Figure 1A**). The arena was 15 cm  
84 large, 11.5 cm high, and 3 cm deep (approximately 6 x 5 x 1 fish body lengths) and contained around 400 mL of  
85 water, allowing us to investigate zebrafish displacement in both the vertical and horizontal dimensions. The flow  
86 rate was adjusted to 90 mL/min, which was fast enough to rapidly clear the arena, but not strong enough to  
87 exhaust or stress the fish. In addition, a T-shaped connector deflected the inflow towards the lateral walls (**Figure**  
88 **1A**). This was to avoid pushing the fish down and to enable a rapid and homogeneous distribution of the stimuli  
89 within the arena. To characterize the onset and dynamic of the olfactory cue delivered to the arena, we replaced  
90 it by a dye and measured the change in reflected light overtime (**Figure 1B**). The cue reached the arena 8 seconds  
91 after the valve opened and rapidly spread through the arena, covering its entire volume within 30 seconds. The  
92 cue concentration had returned to pre-stimulus levels within 15 minutes (**Figure 1C**). Based on this, we chose an  
93 inter-trial duration of 20 minutes to ensure complete clearance of prior cues before the following recording  
94 started.

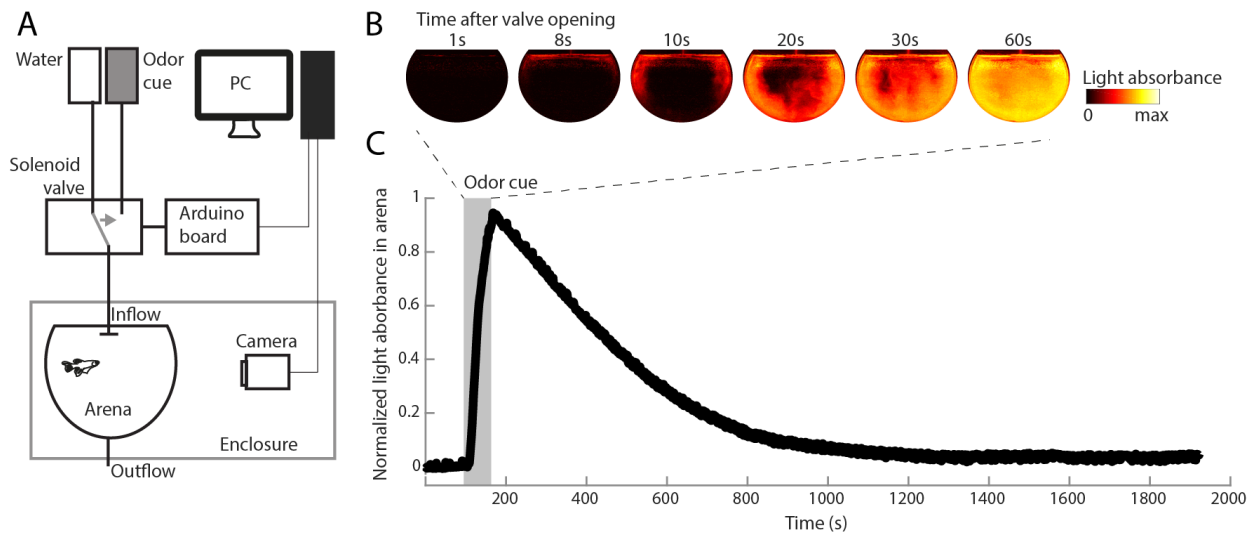

95

96 **Figure 1: Experimental setup.** A) Schematic of the experimental setup enabling to deliver olfactory cues to the arena where  
97 the fish is swimming using a computer-controlled solenoid valve. B) Image series showing the rapid and evenly spread of the  
98 olfactory cue within the arena after valve opening. The olfactory cue was replaced by a dye whose normalized concentration  
99 in the arena is plotted over time (0 = no stimulus; 1 = same concentration as in the odor cue bottle). C) Dynamic of stimulus  
100 concentration in the arena over the course of 30 minutes. The valve was open for 1 min.

101

102

### Characterization of zebrafish behavior in response to diverse olfactory cues

103

104

105

106

107

108

109

110

111

112

113

114

115

116

117

118

119

120

121

122

123

124

125

126

127

To characterize zebrafish olfactory behaviors, we then measured the swimming trajectory of 10 adult fish (7 males and 3 females) in response to these 17 odorants and to a water control. Single fish were habituated to the arena and olfactory cues were delivered after a 5 min baseline period. Mapping the fish position after the odor cue delivery yielded occupancy maps that differed markedly across odorants (Figure 2 A,B,C,D). In particular, feeding cues such as food extract, nucleotides and methionine induced exploration of the upper part of the arena (Figure 2A), where the odor cue was first delivered. In contrast, fish swam at the bottom of the tank in response to alarm cues such as blood and skin extract (Figure 2C). Overall, except increased activity closer to the lateral walls, the average occupancy map in response to feeding (Figure 2F) and social cues (Figure 2G) showed no clear differences compared to the water control (Figure 2E). This was likely due to the important inter-cue variability within these categories. Average occupancy maps in response to alarm cues (Figure 2H) revealed a consistent increase in bottom diving, that was also observable, although to a lesser extent, in response to decay cues (Figure 2I).

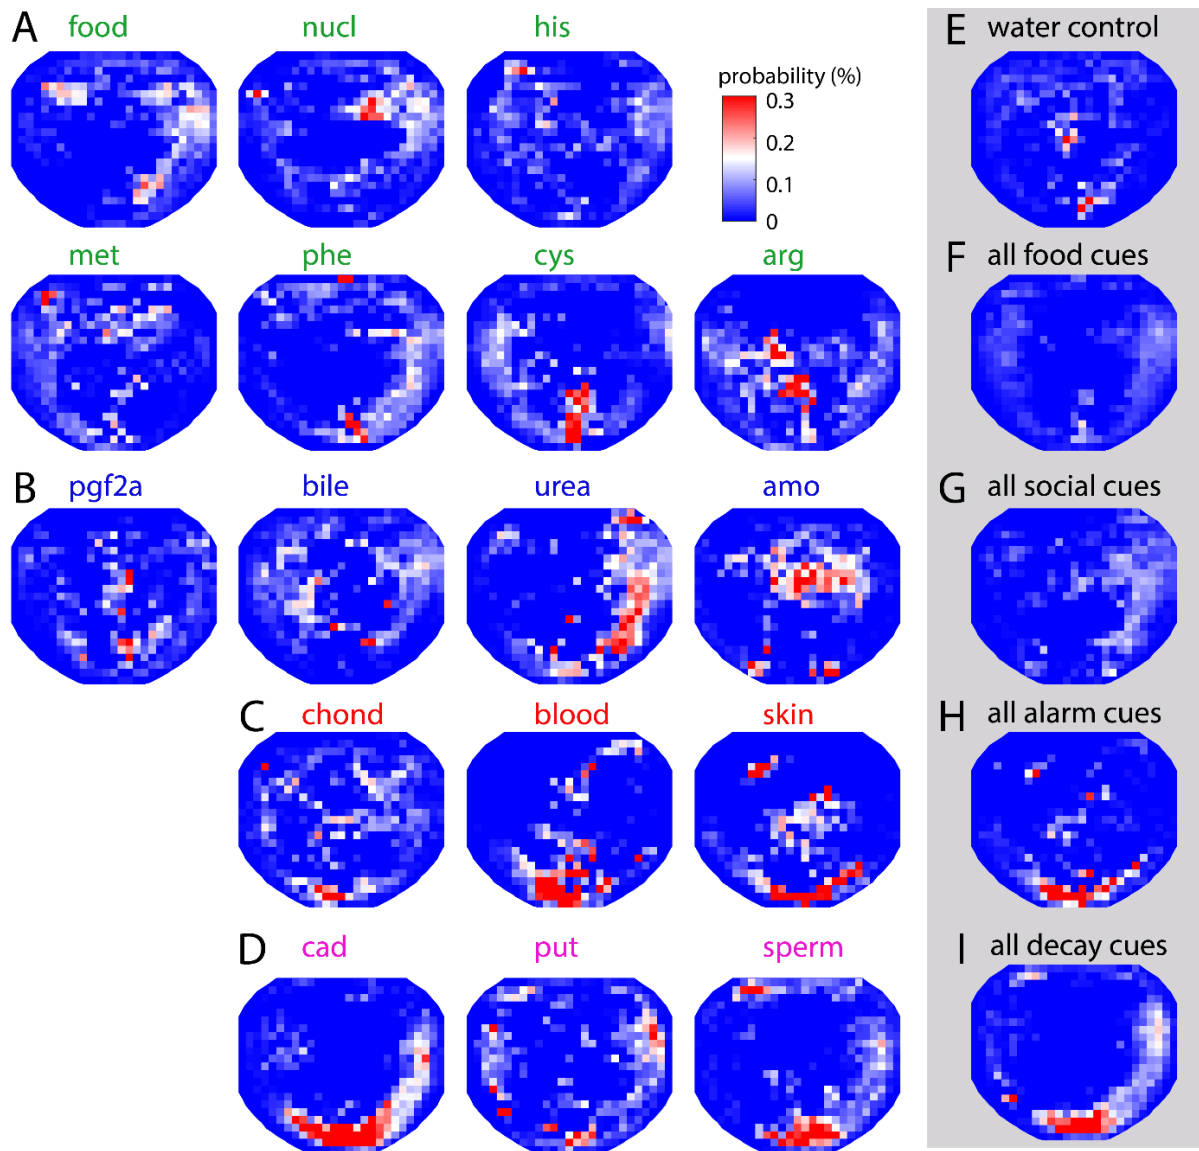

128

129 **Figure 2. Spatial response of adult zebrafish to ecologically relevant odorants.** Average occupancy maps representing the  
 130 zones increasingly explored after onset of the olfactory cues ( $n=10$  zebrafish): in response to **A)** Food-related cues (food extract,  
 131 nucleotides, histidine, methionine, phenylalanine, cysteine and arginine, in green); **B)** Social-related cues (prostaglandin  $2\alpha$ ,  
 132 bile acids, urea and ammonium, in blue); **C)** Decay cues (putrescine, spermine, cadaverine, in red); **D)** Alarm cues  
 133 (chondroitin sulfate, zebrafish blood, zebrafish skin extract, in red); **E)** Water control. **F)** Average of all food cues maps in **A**. **G)**  
 134 Average of all social cues maps in **B**. **H)** Average of all alarm cues maps in **C**. **I)** Average of all decay cues maps in **D**.

### 135 Quantification of odor-evoked changes in behavioral metrics

136 To quantify the dynamics of zebrafish locomotor behavior in response to odor cues, we calculated the  
 137 odor-induced changes in the fish velocity (**Figure 3A**), the amount of burst swimming (**Figure 3B**) and the number  
 138 of abrupt turns (**Figure 3C**), as well as the amount of horizontal (**Figure 3D**) and vertical swimming events (**Figure**  
 139 **3E**). To quantify the valence of odor cues, we also calculated the change in metrics reflecting decreased  
 140 exploration, such as time spent freezing (**Figure 3F**) and the fish position along the vertical axis (**Figure 3G**), which  
 141 are considered to be indications of anxiety and fear in fish. Representative examples of responses to selected  
 142 olfactory cues are illustrated in **Sup. Figure 1**. Using these metrics, we built behavioral ethograms systematically  
 143 describing the odor-induced changes in response to our diverse set of olfactory cues (**Figure 3A-G**). Importantly,  
 144 we found no change in any of the behavioral metrics after water control delivery, indicating that small variation  
 145 in flow rate or vibrations due to the valve opening and closing did not trigger behavioral responses.

146 Significant changes in swimming speed characterized by increased velocity and number of burst  
 147 swimming events concerned the same odor cues: 4 food cues, 2 social cues and spermine. A significant increase  
 148 in the amount of abrupt turns, possibly indicative of erratic swimming (Blaser & Gerlai, 2006), was observed in

149 response to two decay cues (cadaverine and spermine). Interestingly, blood also elicited a marginally significant  
 150 increase in sharp turns (**Sup. Table 1**,  $p=0.076$ ). Changes in swimming strategy, in particular the amount of  
 151 horizontal and vertical swimming have been observed in several fish species, related to foraging and spawning  
 152 (Nakamura I, Watanabe YY, Papastamatiou YP, Sato K, & Meyer CG, 2011). Here, we observed a decrease in time  
 153 spent swimming horizontally in response to urea and chondroitin. Interestingly, food extract elicited a marginally  
 154 significant increase in the amount of horizontal swimming, a result reminiscent of foraging behaviors. Vertical  
 155 swimming, up or down, was significantly increased in response to the 3 decay cues cadaverine, putrescine and  
 156 spermine. Remarkably, the fear or anxiety-related behavioral indices freezing and vertical position in the tank,  
 157 were significantly modulated solely after exposure to 2 out of 17 odors: the alarm cues skin and blood extracts.  
 158 The time spent freezing and time spent lower in the arena increased in response to both of these cues, similar  
 159 to what has been already been reported in response to skin extract (Blaser & Gerlai, 2006; Mathuru et al., 2012;  
 160 Pfeiffer, 1963). Conspecific blood elicits the whole suite of specific alarm behaviors displayed in response to skin  
 161 extract and thus seems to be a novel and equally powerful alarm substance in zebrafish.

162 To determine whether the behavioral metrics captured independent aspects of the odor response, we  
 163 calculated their average pairwise correlation during odor response (**Figure 3H**). As could be expected, freezing  
 164 was negatively correlated to most active locomotion indexes (velocity, burst swimming and horizontal swimming,  
 165 **Figure 3H**), as well as to the vertical position in the tank, reflecting the fact that the majority of freezing took  
 166 place at the bottom of the arena. To the exception of burst swimming that was strongly positively correlated to  
 167 velocity, most metrics were weakly (anti-)correlated, indicating that they captured relatively independent  
 168 aspects of the behavioral response.

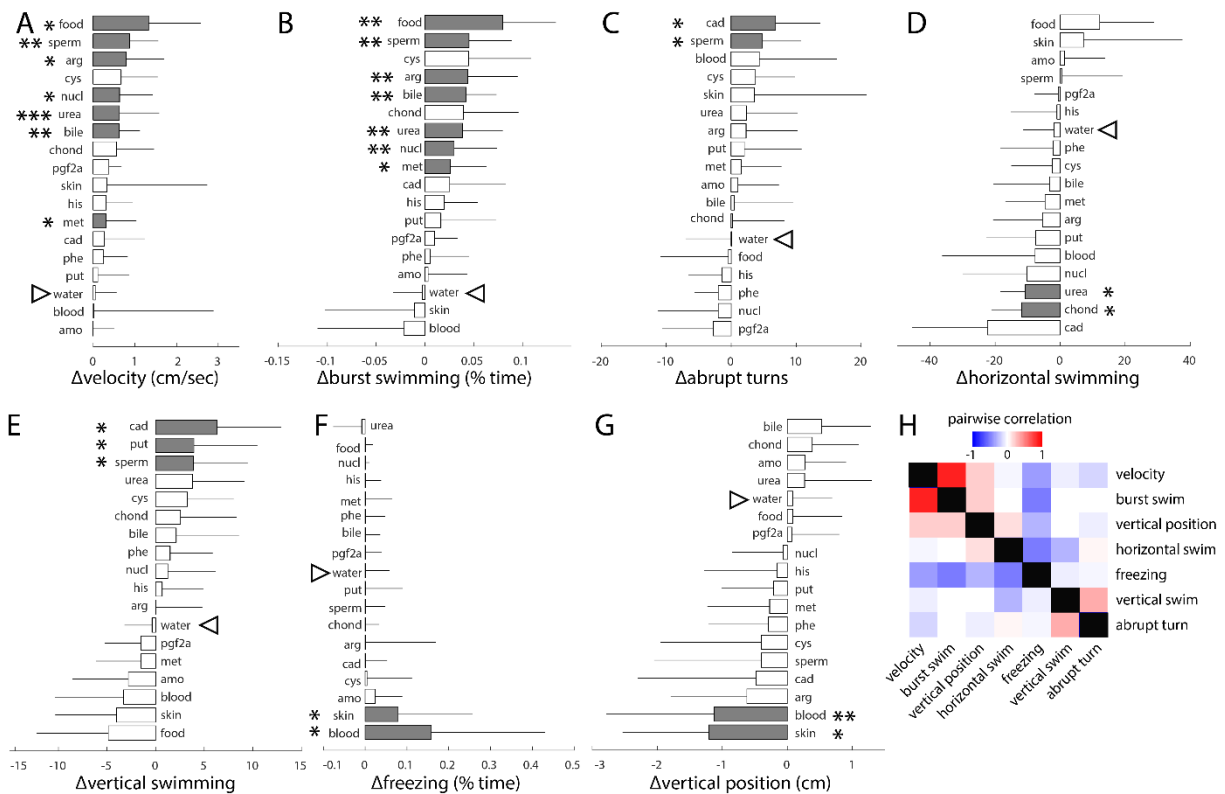

170 **Figure 3: Behavioral responses of adult zebrafish to ecologically relevant odorants.** Change in seven behavioral response  
 171 metrics during the first two minutes following odor delivery: **A)** velocity, **B)** percentage of burst swimming, **C)** number of  
 172 abrupt turns, **D)** horizontal swimming, **E)** vertical swimming, **F)** freezing, **G)** vertical position in the arena. The filled grey bars  
 173 indicate significant differences from the water control, indicated by an arrowhead (Mann-Whitney U test; \* $p<0.05$ , \*\* $p<0.01$   
 174 and \*\*\* $p<0.001$ , see **Sup. Table 2** for all  $p$  values). Data are represented as mean + standard deviation. **H)** Pairwise correlation  
 175 between all response indices in A-G.

### 176 Consistency of odor responses within and between fish

177 The reproducibility or consistency of a behavior within and across individual is an important aspect of  
 178 an animal's response (Bell, Hankison, & Laskowski, 2009) quantifying how robust the observable behavior is over  
 179 repeated presentation. Visual inspection of behavioral response metrics during an odor trial in our study

180 indicated that fish could display similar responses to odor replicates (**Sup. Figure 1**). For example, the patterns  
 181 of freezing and vertical position in response to blood and the number of abrupt turns in response to skin extract  
 182 are remarkably similar across replicates (**Sup. Figure 1A,C,G**). However, this is not the case for all odor cues,  
 183 indicating that only a few specific odor cues might generate repeatable behaviors within fish. In order to quantify  
 184 whether odor behavioral responses were repeatable, we measured the average correlation between behavioral  
 185 responses to odor replicates (**Figure 4A**). Most odor cues elicited weakly correlated responses. However,  
 186 cadaverine, blood, skin extract, food odor and bile acids displayed higher inter-replicate correlations ranging  
 187 from 0.37 to 0.59 (**Figure 4A**), confirming that a specific subset of odors elicit consistent responses within fish. In  
 188 order to determine whether odor cues elicited similar responses across fish, we calculated the average  
 189 correlation in behavioral response between all pairs of fish for each odor (**Figure 4B**). Odors eliciting the most  
 190 reproducible responses across fish were chondroitin sulfate, cadaverine, putrescine and urea, with between fish  
 191 correlation ranging from 0.30 to 0.43. Interestingly, cadaverine elicited consistent responses both within and  
 192 between fish (**Figure 4C**).

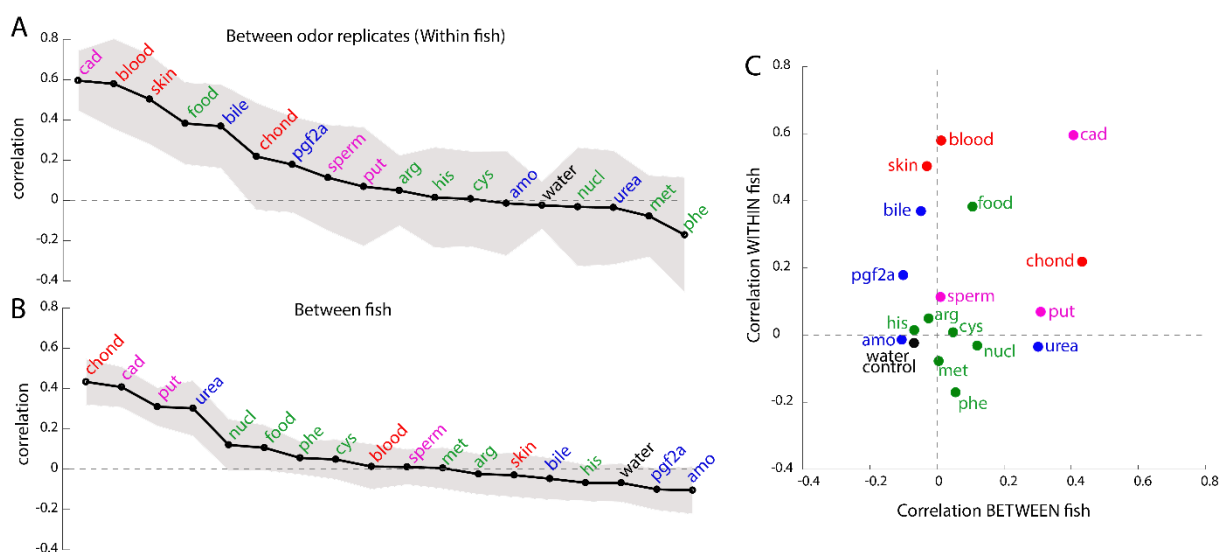

193  
 194 **Figure 4. Consistency of odor responses within and between fish. A)** Consistency of odor responses within individual fish. The  
 195 average correlation (black line) between behavioral responses to replicates of the same odor within fish is plotted for all odor  
 196 cues. Behavioral response was represented by a vector of the seven behavioral metrics described in Figure 3, averaged during  
 197 the odor delivery period. **B)** Consistency of odor responses across different fish. The average correlation (black line) between  
 198 the behavioral responses of all fish is plotted for all odor cues. The grey shaded area indicates s.e.m. **C)** Summary of data in A  
 199 & B.

## 200 Categorization of odors based on multi-dimensional olfactory behavior metrics.

201 Next, we set to categorize odors based on behavioral responses, using a combination of all the metrics  
 202 described above. To achieve this, we used hierarchical clustering to group olfactory cues eliciting similar  
 203 behavioral responses (**Figure 5A**), based on the euclidean distances between all pairs of odors (**Figure 5B**).  
 204 Clustering our broad set of odors based on zebrafish behavioral responses led to a categorization of odors. A first  
 205 subset of amino acids, composed of methionine, histidine and phenylalanine, did not elicit responses  
 206 prominently different from water control, likely due to the partial contribution of these monomolecular odors to  
 207 feeding behavior. A second subset of amino acids, composed of cysteine and arginine, clustered together with  
 208 the decay-related amine spermine. A third subset, composed solely of the natural feeding cue, food extract,  
 209 elicited a different behavioral response from amino acids, which are monomolecular feeding cues. Similarly,  
 210 although two natural alarm cues (blood and skin extracts) clustered together and were clearly different from all  
 211 other odorants, the monomolecular alarm cue chondroitin sulfate was not part of that cluster.

212 To further facilitate the visualization of the complex behavioral response to the different odor  
 213 categories, and to account for the dependencies between response  
 214 measures (**Figure 3H**), we performed a dimensionality reduction analysis using principal component analysis  
 215 (PCA, **Figure 5C**). We found that the 3 first components of the behavioral space accounted for 89% of the variance,  
 216 suggesting that olfactory responses can be explained by a combination of a few major behavioral programs.

217 The first PC clearly segregated food extract at one end and blood as well as skin extracts at the other  
 218 end (**Figure 5C; Sup Figure 2A,C**). PC1 was positively correlated with decreased locomotion (velocity, burst swim),  
 219 and increased fear or anxiety-like indices (bottom diving and freezing (**Figure 5D**)) thus possibly contrasting  
 220 immediate rewards and threats. PC2 mostly separated animals movement in the horizontal versus vertical  
 221 dimensions (**Figure 5E**), which is likely to represent evasive and exploratory behaviors. Finally, PC3 mostly  
 222 represented parameters related to locomotion speed (**Figure 5F**).

223 Taken together, our results suggest that odors can be categorized based on olfactory behavioral metrics,  
 224 yet the natural complex odors such as food, blood or skin extracts elicit clearly different and more prominent  
 225 responses, when compared to monomolecular odors that were proposed to elicit stereotyped behaviors. We  
 226 also observed that olfactory behaviors in response to 17 odors, can be explained by a handful of behavioral  
 227 programs represented by the first three PCs.

228

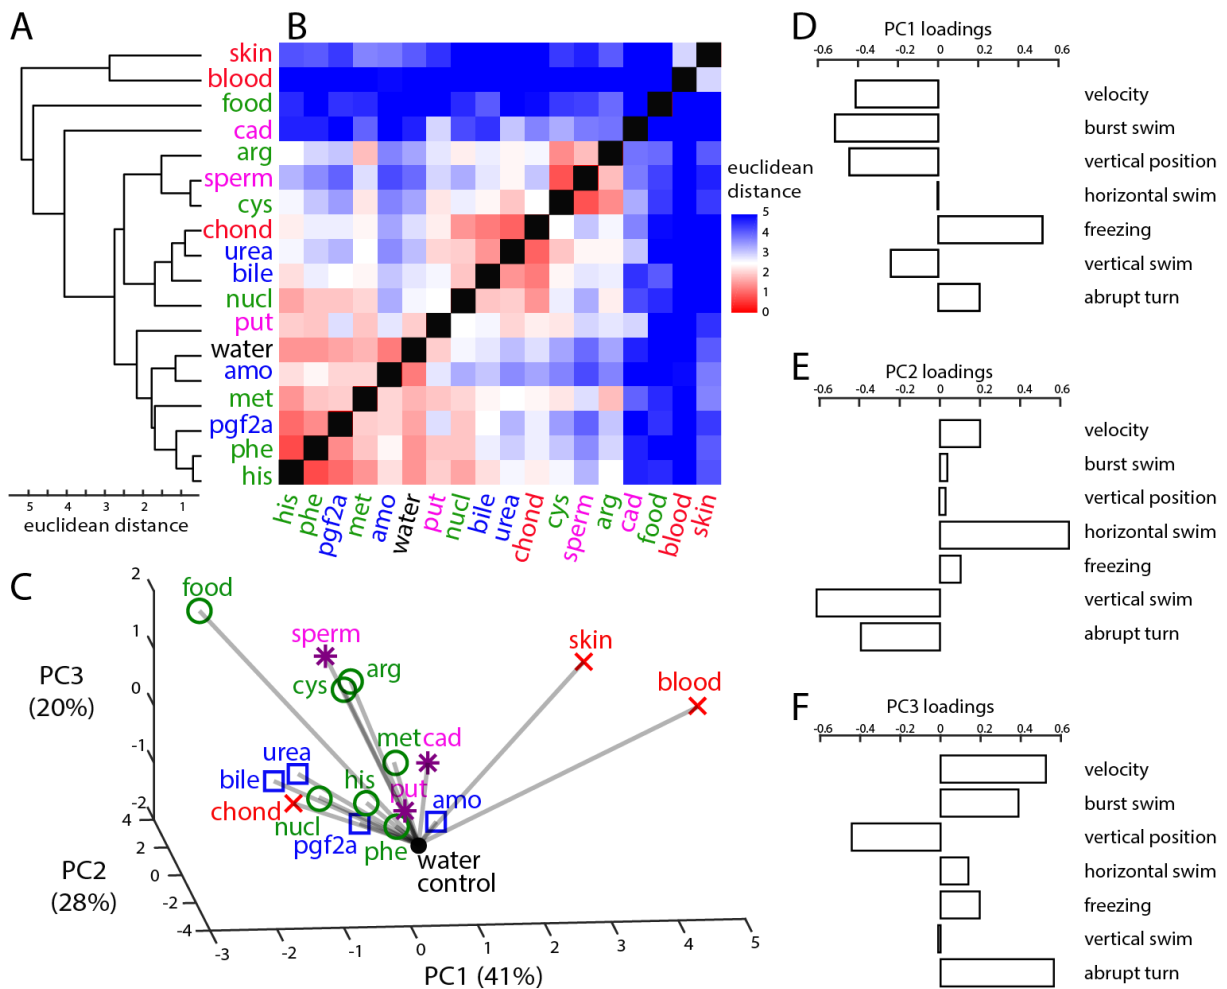

229

230 **Figure 5: Behavior-based categorization of olfactory cues.** **A)** Dendrogram representing the hierarchical clustering based on  
 231 Euclidean distances between olfactory behaviors. **B)** Pairwise Euclidean distances between behavioral responses to all  
 232 olfactory cues (7 response metrics,  $n=10$  fish). Red indicates similar, and blue dissimilar, behavioral responses. **C)**  
 233 Representation of all olfactory cues in the space composed of the first three principle components (PC) of the zscored median  
 234 behavioral response across fish. The percentage of variance explained by each PC is indicated between brackets. Grey lines  
 235 indicate the distance of each odor cue to the water control (filled black dot). Food-related cues (food extract, histidine,  
 236 nucleotides, methionine, phenylalanine, cysteine and arginine) are represented by green circles. Social-related cues (bile acids,  
 237 prostaglandin 2 $\alpha$ , urea and ammonium) are represented by blue squares. Decay cues (putrescine, spermine, cadaverine) are  
 238 represented by magenta asterisks. Alarm cues (chondroitin sulfate, zebrafish blood, zebrafish skin extract) are represented by  
 239 red crosses. **D,E & F)** Respective contribution of all seven behavioral response metrics to PC1, PC2 and PC3.

240

241

## 242 DISCUSSION.

243 **Advantages and limitations of the medium-throughput olfactory behavior assay.** We describe a medium-  
244 throughput setup to measure the behavior of individual fish exposed to olfactory cues of known concentrations.  
245 The automated delivery combined with rapid odor clearance enable to test multiple stimuli a day without  
246 manipulating the fish, while ensuring trial-to-trial reproducibility in stimulus dynamic. Precise control of cue  
247 concentration and dynamic is crucial for reproducible experiments, since it influences odor detection and valence  
248 (Semmelhack & Wang, 2009). Unlike studies in terrestrial animals where the delivery of airborne chemicals is  
249 controlled by olfactometers and measured by photoionization detectors (Johnson & Sobel, 2007; F. Kermen et  
250 al., 2011), measuring and rapidly clearing odors in the turbulent aquatic medium has proven challenging (Gerlai,  
251 2011). Therefore, aquatic studies often confine the stimulus within the arena: in two-current choice flumes (Hinz  
252 et al., 2013; Hussain et al., 2013), or using point source delivery (Koide et al., 2009; Mathuru et al., 2012; Wakisaka  
253 et al., 2017; Yabuki et al., 2016), which complicates the calculation of odor detection threshold and results in  
254 different odor exposure duration between fish. Here, we opted for local delivery combined with a rapid and  
255 homogeneous distribution of the cue. One drawback of our approach is to not allow for calculating a preference  
256 index (Hussain et al., 2013; Florence Kermen et al., 2016; Steck et al., 2012). However, we still observed clear  
257 responses to cues of opposite valence, in particular along the vertical dimension of the arena (**Figure 3**). In  
258 addition, a major advantage was to ensure spatially and temporally reproducible exposure over similar durations,  
259 a feature certainly useful for comparing inter-individual differences in olfactory thresholds.

260 **Metrics for fish locomotion.** Locomotor activity of larval zebrafish is relatively well studied (Burgess & Granato,  
261 2007; Mirat, Sternberg, Severi, & Wyart, 2013; Muto & Kawakami, 2013; Umeda & Shoji, 2017), however the  
262 metrics describing adult zebrafish behavior are scarce. Previous studies have used swimming speed and  
263 preference index to quantify olfactory behaviors. Zebrafish react to odor upon detection by an increase or a  
264 decrease in swimming speed. However, odors of different valence or ecological significance such as food related  
265 cues, and alarm cues can both increase swimming speed (Koide et al., 2009; Mathuru et al., 2012; Wakisaka et  
266 al., 2017). Moreover, the same fish can display biphasic responses to alarm substances, characterized by an  
267 alternation of freezing episodes (decreased speed) and bursts of erratic swimming (rapid disorganized swimming  
268 with sharp turning angles) (Gilson Volpato & Percília Giaquinto, 2001; Souza-Bastos, Freire, & Fernandes-de-  
269 Castilho, 2014). To best describe these temporally and spatially complex adult fish olfactory reactions, it is  
270 necessary to use a combination of metrics. Behaviors like erratic swimming are usually visually quantified by the  
271 experimenter (Døving & Lastein, 2009). Here, we used an entirely automated analysis to extract metrics  
272 classically used in the behavior analysis, such as velocity, burst of acceleration, vertical position in the tank,  
273 amount of freezing. We also used additional parameters such as amount of sharp turns  $> 90^\circ$ , in order to quantify  
274 erratic movements and the patterns of vertical or horizontal swimming in order to examine the direction of  
275 swimming trajectory. Interestingly, we found that the 5 odors eliciting the largest increase in abrupt turns were  
276 2 decay odors (cadaverine & spermine), 2 alarm cues (blood and skin extract) and an aversive amino acid  
277 (cysteine), indicating that the number of sharp turns could be an appropriate new metric to measure erratic  
278 movements in response to aversive stimuli.

279 **Responses to feeding cues.** Fish detected most feeding cues as indicated by the significant increase in swim  
280 velocity and amount of burst swimming in response to 4 out of 7 food cues tested (nucleotides, methionine,  
281 arginine, and food extract). Testing each compound separately enabled us to uncover subsets of differing valence  
282 within amino acids. Indeed, cysteine and arginine clustered together with the decay-odor spermine and differed  
283 from other feeding cues in that they elicited more abrupt turns and bottom diving than other amino acids or the  
284 attractive nucleotides. This resonate with previous findings reporting that larval and adult zebrafish robustly  
285 avoid cysteine (Kaniganti et al., 2019; Vitebsky et al., 2005). Our results confirm this and propose arginine as an  
286 aversive amino acid.

287 **Responses to social cues.** Bile acids are thought to be migratory cues guiding sea lampreys to spawning sites  
288 (Peter W. Sorensen et al., 2005). Here we found that they elicited an increased locomotion, similar to that evoked  
289 by feeding cues in this study and previous reports (Koide et al., 2009). Interestingly, urea evokes a very similar  
290 response to bile acid and was the closest related odorant in the behavioral space. No strong reaction was found  
291 in response to ammonium. Prostaglandin  $2\alpha$  is a steroid hormone produced by ovulated female fish that serves  
292 as a reproductive pheromone. It is detected by male fish olfactory system and contributes to the initiation of  
293 courtship in goldfish and zebrafish. Previous studies have shown that pgf $2\alpha$  exposure induces moderate  
294 behavioral response in male fish tested alone, but dramatic changes when tested in groups (P. W. Sorensen,  
295 Hara, Stacey, & Goetz, 1988; Yabuki et al., 2016). Here, we observed no noticeable response to pgf $2\alpha$  in



296 individually tested fish, that were either males or females, confirming the necessity of group testing for this odor.  
297 This raises the interesting possibility that multimodal integration of olfactory information with additional sensory  
298 cues (vision, touch) is necessary to initiate attraction to pgf2 $\alpha$ .

299 **Responses to alarm cues.** Fish belonging to the Ostariophysi superorder (including zebrafish), display  
300 stereotyped anti-predator responses to chemical compounds released by damaged conspecific skin (Døving &  
301 Lastein, 2009). In agreement with this, we observed a significant increase in freezing and bottom diving in  
302 response to zebrafish skin extract. Blood can also be released when conspecifics are injured and was reported  
303 to decrease locomotion and increase latency to feed in the Nile Tilapia (Barreto et al., 2013a). Extending those  
304 findings, we show that low concentrations of conspecific blood (0.01%) elicited strong anti-predator responses  
305 (freezing and bottom diving) in adult zebrafish. Thus, our data suggest that anti-predator behavior in response  
306 to injured conspecifics within shoals could be jointly mediated by damage-released chemical cues present in the  
307 blood and skin.

308 **Responses to decay cues.** Decomposition of fish flesh by bacteria releases ‘death-associated’ diamines such as  
309 cadaverine (Ben-Gigirey, Vieites Baaptista de Sousa, Villa, & Barros-Velazquez, 1999), which are avoided by adult  
310 zebrafish (Hussain et al., 2013). Interestingly, the decay odor spermine clustered with the aversive amino acid  
311 cysteine (Vitebsky et al., 2005). Both cadaverine and spermine produced significantly more abrupt turns than the  
312 water control, similar to responses to negative valence odorants (skin, blood, **Figure 3C**), suggesting that the  
313 decay cues were perceived as aversive. However, we found that decay odors induce only mild amounts of bottom  
314 diving and do not evoke freezing, which is consistent with previous reports (Hussain et al., 2013). To our  
315 knowledge, this is the first study that directly compares the responses to decay and alarm cues, which are  
316 released by dead or hurt animals. We found that decay cues did not cluster with the potent skin extract and  
317 blood alarm cues, confirming that they elicited a response that is qualitatively different from alarm cues in  
318 zebrafish. This finding is consistent with the ecology of these odors, given that alarm substances indicate a freshly  
319 wounded or killed fish, thus a high probability for an imminent threat, whereas bacteria-mediated production of  
320 decay cue takes hours to develop and thus signals a long-gone threat.

321 **Complex blends versus single compounds.** Among feeding cues, the natural and complex food extract elicited  
322 the strongest response (**Figure 3A,B**), compared to simpler odors containing one or 2 monomolecular odorants,  
323 and was in general very different from all these cues (**Figure 5A,B**). Similarly, skin and blood extracts evoked  
324 strong anti-predator responses, yet no such responses were observed to chondroitin sulfate in the same fish. It  
325 is unlikely that these differences are due to a lack of detection of the individual molecules, since the  
326 monomolecular odorants were presented at concentrations superior to the thresholds reported to elicit  
327 responses in zebrafish (Koide et al., 2009; Mathuru et al., 2012). Rather, this indicates that partial odor cues for  
328 feeding and alarm response do not elicit the full behavioral program.

329 **Inter- and intra-individual variability.** Despite the increasing amount of studies interested in fish olfactory  
330 behaviors, few reports whether fish consistently respond to successive presentations of an odor cue (Imre, Di  
331 Rocco, Brown, & Johnson, 2016), and the robustness of odor response has not been systematically investigated  
332 for a broad range of odorants. We found that less than a third of the odors used here evoked reproducible  
333 responses within individual. Interestingly, cadaverine was the only monomolecular odor cue eliciting strongly  
334 consistent response both within and between fish. All other odors eliciting highly consistent responses within  
335 fish (bile acids, food, skin extract and blood), were only weakly correlated across fish. This could be due to the  
336 fact that individual zebrafish can use temporally consistent but different strategies for feeding (bottom vs top  
337 feeders) and defensive behaviors (proactive vs reactive coping styles) (Øverli et al., 2007). Conversely,  
338 chondroitin sulfate, urea and putrescine induced similar average responses across fish, but were only weakly  
339 consistent within fish. This emphasizes that intra- and inter-individual variability parameters describe different  
340 aspects of the behavioral responses. Thus, we suggest that odors with high intra-individual and low inter-  
341 individual reproducibility are useful stimuli to compare the behavioral and neural responses across fish with  
342 different personality traits, while investigating such individual differences.

343 In conclusion, our medium-throughput olfactory behavioral assay provides a low-cost and open setup  
344 to reproducibly measure olfactory reaction to multiple compounds in fish. Using this approach enabled us to  
345 collect an unprecedented amount of olfactory responses covering the natural stimulus space in adult zebrafish.  
346 We confirmed previously described behavioral responses to classically used odorants and also characterized a  
347 new powerful alarm substance (blood). We also provide recommendation for future studies to take into account  
348 the inter- and intra-individual reproducibility of odor behaviors. Finally, beyond neuroscience questions,  
349 olfaction psychophysics in fish also has important impacts in terms of species conservation. In this context, it is

350 timely and crucial to provide tools and methods to reliably quantify the olfactory behavior in aquatic species to  
351 assess and ultimately limit the negative anthropogenic impact on aquatic ecosystems.

352

## 353 METHODS

354 **Animal and housing.** To allow future comparison with functional imaging studies, the behavioral experiment  
355 were carried out in transgenic zebrafish *Danio rerio* expressing the fluorescent calcium indicator Gcamp5 pan-  
356 neuronally (elavl3:GCaMP5 nacre, (Ahrens, Orger, Robson, Li, & Keller, 2013) ). A total of 10 fish aged 6-12  
357 months, including 3 females, were used. Fish measured on average 2.5 cm (+/- 0.16 std) from the tip of the nose  
358 to the base of the tail. They were kept in 3.5 liter tanks in a recirculating fish housing system (ZebTec Active Blue  
359 Stand Alone, Techniplast) at 28 °C under a 14:10 hour light/dark cycle. Two weeks before the start of  
360 experiments, pairs of fish were placed in a 3 L tank and isolated from each other by a transparent separator to  
361 keep track of individual fish day after day. Fish were fed once in the evening during the behavioral testing period  
362 and were thus food-deprived for 18h before testing. All animal procedures were performed in accordance with  
363 the animal care guidelines and approved by the Ethical Committee of KULeuven in Belgium and the Norwegian  
364 Food Safety Authority.

365 **Olfactory cues.** Seventeen odorants, previously documented to activate the olfactory system in a range of  
366 aquatic species, and a water control were tested in this study. Single compounds odorants were purchased from  
367 Sigma Aldrich (Table1). Stock solutions were prepared, kept at -20°C, and diluted to final concentration in  
368 artificial fish water (AFW; 0.2 g/L marine salt in reverse osmosis water) the morning of the experiment. The final  
369 concentration to which the fish were exposed is documented in Table 1 for each olfactory cue. Food odor, blood,  
370 chondroitin sulfate and skin extract were freshly prepared the morning of the experiment. Food odor was  
371 prepared by incubating 1 g of commercially available fish food (SDS100, Scientific Fish Food) in 50 mL of AFW for  
372 30 min. The solution was then filtered and further diluted 1:10 in AFW. For blood odor collection, adult nacre  
373 fish were rapidly euthanized in ice-cold water, the tail was cut close to the anal orifice and blood was collected  
374 from the dorsal aorta using a 20 µL pipette (Pedroso et al., 2012). 30 µL of blood was diluted in 300 mL of ice-  
375 cold AFW, filtered, and kept at 4°C until 1 hour before the start of the experiment the same day. Importantly, we  
376 made sure to sample blood from the dorsal aorta without touching the skin to avoid contamination by alarm  
377 cues released by epidermal club cells. For skin extract, adult nacre fish were rapidly euthanized in ice-cold water,  
378 decapitated and the skin was peeled off from the body. The collected skin (0.2 g) was incubated in 1 ml of AFW,  
379 mixed and centrifuged at 1300rpm and 4°C for 1h. 1 mL of the supernatant was then dissolved in 300 mL of AFW  
380 (Jetti, Vendrell-Llopis, & Yaksi, 2014b). Chondroitin sulfate was diluted the morning of the experiment as  
381 previously described (Mathuru et al., 2012), to avoid damage of this heavy molecule by freezing the stock  
382 solutions.

383

384

385

386

387

388

389

390

391

392

393

394

395

396 **Table1: List of odorants used.**

| short name | full name               | category           | concentration          | CAS number            |
|------------|-------------------------|--------------------|------------------------|-----------------------|
| chond      | chondroitine sulfate    | alarm substance    | 1 µg/mL water          | 9082-07-9             |
| skin       | skin extract            | alarm substance    | 0.2 g/300 mL water     | see methods           |
| blood      | blood                   | alarm substance    | 1 µl/10 mL water       | see methods           |
| cad        | cadaverine              | decay odor         | 10 <sup>-4</sup> mol/L | 462-94-2              |
| put        | putrescine              | decay odor         | 10 <sup>-4</sup> mol/L | 33-93-7               |
| sperm      | spermine                | decay odor         | 10 <sup>-4</sup> mol/L | 71-44-3               |
| phe        | L-Phenylalanine         | foraging           | 10 <sup>-4</sup> mol/L | 63-91-2               |
| arg        | L-arginine              | foraging           | 10 <sup>-4</sup> mol/L | 74-79-3               |
| his        | L-histidine             | foraging           | 10 <sup>-4</sup> mol/L | 5934-29-2             |
| ala        | L-alanine               | foraging           | 10 <sup>-4</sup> mol/L | 56-41-7               |
| met        | L-methionine            | foraging           | 10 <sup>-4</sup> mol/L | 63-68-3               |
| cys        | L-cysteine              | foraging           | 10 <sup>-4</sup> mol/L | 52-90-4               |
| glut       | L-glutamic acid         | foraging           | 10 <sup>-4</sup> mol/L | 56-86-0               |
| food       | food odor               | foraging           | add concentration      | see methods           |
| nucl       | nucleotides (IMP & AMP) | foraging           | 10 <sup>-4</sup> mol/L | 84-21-9 ; 352195-40-5 |
| bile       | taurocholic acid        | social interaction | 10 <sup>-4</sup> mol/L | 345909-26-4           |
| amo        | ammonium chloride       | social interaction | 10 <sup>-4</sup> mol/L | 12125-02-9            |
| pgf2α      | prostaglandin 2α        | social interaction | 10 <sup>-7</sup> mol/L | 38562-01-5            |
| urea       | urea phosphate salt     | social interaction | 10 <sup>-4</sup> mol/L | 4861-19-2             |
| water      | water control           | control            |                        |                       |

397

398 **Behavioral setup.** Each fish was allowed to freely swim in a transparent semi-circular vertical arena (maximum  
 399 depth= 15 cm; height= 11.5 cm; width: 3 cm) made of two transparent petri dishes (Falcon, 15cm diameter) glued  
 400 together with epoxy. An opening was made at the top and the arena was equipped with inlet and outlet tubes.  
 401 Water and odor stimuli were kept in glass bottles positioned on an elevated platform, providing a continuous  
 402 inflow (90 mL/min), which was measured and adjusted using a flowmeter (Cole Parmer, 65mm flowmeter with  
 403 a 3/16" carboloy float). An outlet tube overflow ensured that the water volume contained in the arena remained  
 404 constant. To avoid contamination between consecutive stimuli, the tubes were composed of Teflon (Cole  
 405 Parmer, internal diameter: 3.2 mm). The arena was placed within a light-tight enclosure (black hardboard,  
 406 Thorlab) to isolate the fish from visual interference, and a white LED covered by a diffuser provided  
 407 homogeneous lighting inside the enclosure. Fish movement was recorded at 10 Hz using a camera (Manta223B,  
 408 Allied Vision) positioned in front of the arena. Odorant delivery was automatically triggered in synchronization  
 409 with video acquisition using a Matlab/C++ code and a simple electronic circuit composed of an Arduino Uno  
 410 (Arduino) and a three-way solenoid valve (Biochem Fluidics). The dynamic of odorant stimulus in the arena was  
 411 measured using a dye (methylene blue). The day before the experiment started, the fish was habituated to the  
 412 arena for 3 hours, without odorant exposure. Then, at the beginning of each recording day, fish were allowed to  
 413 habituate to the arena for at least 45 min before initiating recordings. Each trial started by 5 minutes without  
 414 odorant, then the valve was switched open for 1 min allowing the odor stimulus to be delivered in the arena.  
 415 Odors were delivered in random order. Zebrafish skin extract and zebrafish blood were delivered at the end of  
 416 the recording session and no additional recordings were taken after these, due to their potent aversive  
 417 behavioral effect. Successive trials were separated by at least 20 min, to allow for complete rinsing of odorant  
 418 before the next trial started. An average number of 2.0 +/- 0.2 replicates per stimulus was collected. The  
 419 experiments were conducted between 1-7 pm in a temperature controlled room (27 °C). The fish was returned  
 420 to its home tank and fed every day at the end of the experiment.

421 **Swim trajectory extraction.** The fish position (centre of mass) was automatically detected after background  
 422 subtraction in Matlab (R2016a). Briefly, a background image was obtained by averaging all frames belonging to  
 423 a given trial. The background was then subtracted from each individual frame. The background subtracted video  
 424 was then processed by an erosion/dilation function. In rare cases where the corner of the arena or a moving drop  
 425 of water was detected instead of the fish, a mask was applied to the image to constrain the detection within the  
 426 arena, and the position was re-extracted. To correct for small day-to-day variation in camera's position compared  
 427 to the arena, the fish's position was converted in cm and normalized across fish by setting the origin to the  
 428 bottom left corner of the arena.

429 **Behavioral response metrics.** We first calculated 7 metrics characterizing zebrafish behavior. Instantaneous  
430 speed (cm/sec) was calculated as the distance between successive positions divided by the recording frequency.  
431 Acceleration (cm<sup>2</sup>/sec) was the first derivative of speed. Freezing episodes were defined as immobility periods  
432 (speed<0.4 cm/sec) that lasted more than 5 seconds. The number of sudden swimming bursts (acceleration >  
433 1cm<sup>2</sup>/sec) and the amount of sharp changes/turns in swim trajectory (turning angle > 90°) were also quantified.  
434 Horizontal and vertical swimming episodes were defined as number of events during which the fish swam with  
435 very little deviations (+/- 10°) from the horizontal and vertical lines, respectively. We then calculated a response  
436 metric associated with each behavioral parameter: difference between average value during 2 min preceding  
437 and following the stimulus onset. Positive values indicate an increase of the behavioral metric after stimulus  
438 delivery, whereas negative values indicate a decrease. Because we observed biphasic panic responses to alarm  
439 cues in most fish (escape first, then freezing), a longer post-odor time window lasting 4 min was used for  
440 quantifying freezing. These individual metrics were then averaged across replicates of the same odorants to yield  
441 a response matrix consisting of 7 metrics x 18 stimuli x 10 fish.

442 **Average occupancy maps.** For each recordings, the arena was tiled into 5 mm squares and the percentage  
443 occupancy of each square was calculated based on the fish position. A differential occupancy map was then  
444 calculated for each odorant by subtracting the occupancy maps before and after odor delivery (during 4 min  
445 each). These differential occupancy maps were then averaged per odor and across fish to yield the average maps  
446 of areas increasingly explored after odor delivery shown in Figure 2.

447 **Statistical analysis.** Data were examined for normality of distribution using a Shapiro-Wilk test in Matlab. As  
448 none of the metrics described here were normally distributed, difference from the water control condition were  
449 detected using a Mann Whitney U test, using a p value of 0.05 as threshold for significance.

450

451

452

453

454

455

456

457

458

459

460

461

462

463

464

465

466

467

468

469

470

471

472 **SUPPLEMENTARY FIGURES & TABLES**

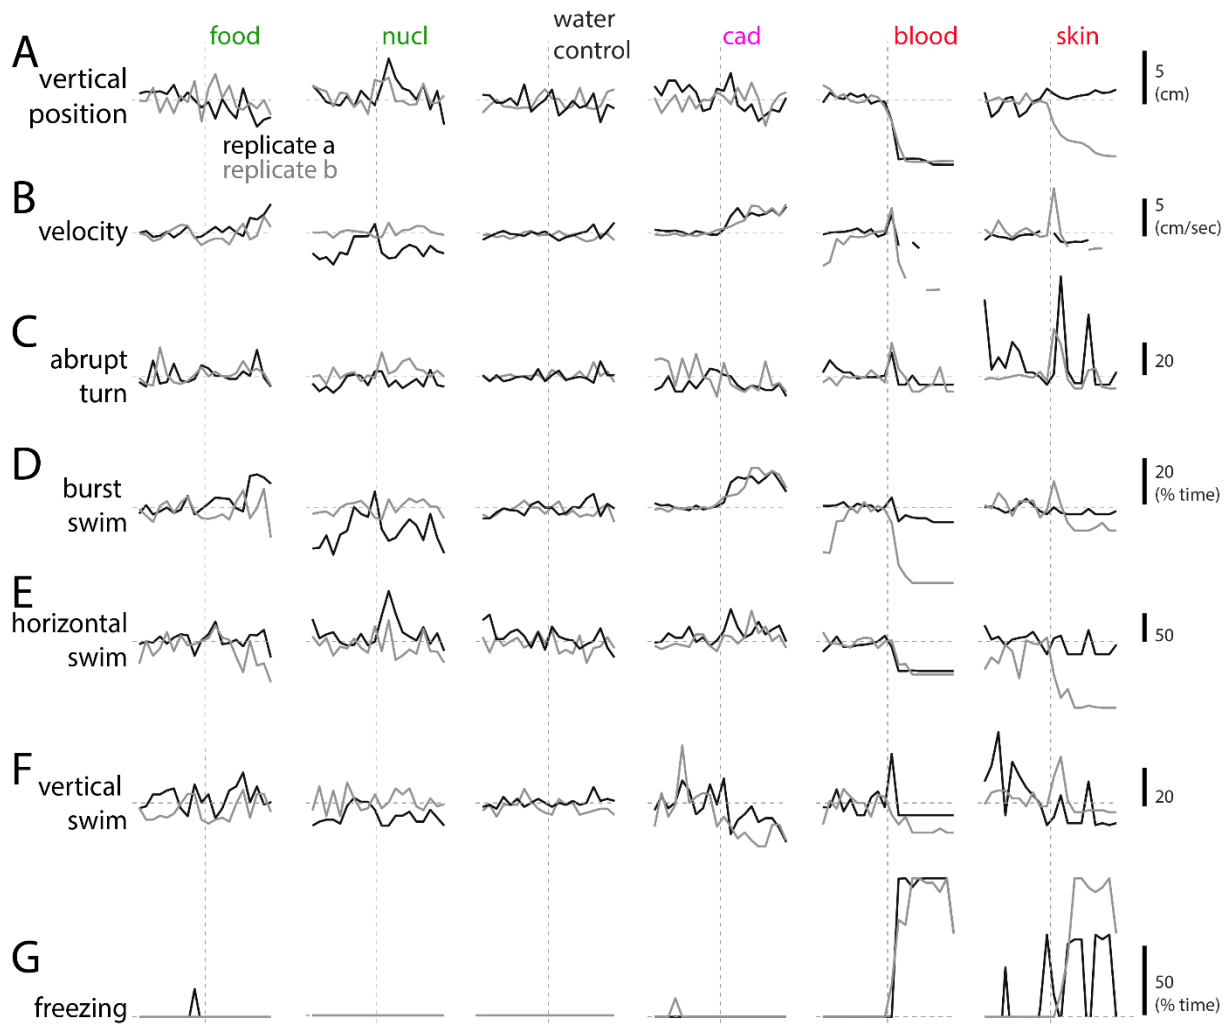

473

474 **Sup figure 1:** Example traces of behavioral parameters change in response to selected odor cues (from left to right : food odor,  
 475 nucleotides, water control, cadaverine, blood and skin extract). All data come from the same fish. Replicates are indicated in  
 476 black (replicate a) and grey (replicate b). Each behavioral parameters was averaged per time bins of 30 sec and normalized  
 477 with respect to the baseline period (2 min before odor delivery). A to G: vertical position, Horizontal grey dotted line indicate  
 478 0. Vertical grey dotted lines indicate odor onset on each graph. The respective scales are indicated to the right for each  
 479 parameters.

480 **Sup table 1: Outcome of statistical tests performed in Figure 3 A-G.** P values corresponding to all odor cue – water control  
 481 pairwise comparisons are displayed here. P values <0.05 are displayed in bold.

|                | feeding cues |              |       |              |       |       |              | social cues  |       |       |                  | control | decay cues   |              |              | alarm cues   |              |              |
|----------------|--------------|--------------|-------|--------------|-------|-------|--------------|--------------|-------|-------|------------------|---------|--------------|--------------|--------------|--------------|--------------|--------------|
|                | food         | nucl         | his   | met          | phe   | cys   | arg          | bile         | pgf2a | amo   | urea             | water   | cad          | put          | sperm        | chond        | blood        | skin         |
| velocity       | <b>0.011</b> | <b>0.028</b> | 0.162 | <b>0.017</b> | 0.212 | 0.243 | <b>0.011</b> | <b>0.002</b> | 0.079 | 0.910 | <b>&lt;0.001</b> | -       | 0.212        | 0.273        | <b>0.002</b> | 0.101        | 0.791        | 0.447        |
| abrupt turns   | 1.000        | 0.720        | 1.000 | 0.406        | 0.678 | 0.091 | 0.273        | 0.678        | 1.000 | 0.678 | 0.146            | -       | <b>0.028</b> | 0.104        | <b>0.011</b> | 0.846        | 0.076        | 0.434        |
| burst swimming | <b>0.009</b> | <b>0.008</b> | 0.140 | <b>0.014</b> | 0.345 | 0.133 | <b>0.002</b> | <b>0.003</b> | 0.113 | 0.970 | <b>0.001</b>     | -       | 0.089        | 0.064        | <b>0.002</b> | 0.068        | 0.521        | 0.905        |
| horz           | 0.076        | 0.133        | 0.734 | 0.571        | 0.427 | 0.549 | 0.385        | 0.734        | 0.842 | 0.678 | <b>0.043</b>     | -       | 0.064        | 0.212        | 0.970        | <b>0.026</b> | 0.791        | 0.661        |
| vert           | 0.104        | 0.182        | 0.970 | 0.385        | 0.623 | 0.113 | 0.705        | 0.212        | 0.412 | 0.473 | 0.237            | -       | <b>0.019</b> | <b>0.038</b> | <b>0.045</b> | 0.274        | 0.064        | 0.053        |
| Y pos          | 0.970        | 0.842        | 0.427 | 0.427        | 0.241 | 0.182 | 0.212        | 0.186        | 0.604 | 0.910 | 0.829            | -       | 0.273        | 0.345        | 0.186        | 0.965        | <b>0.002</b> | <b>0.010</b> |
| freezing       | 0.845        | 0.835        | 0.969 | 0.621        | 0.908 | 0.396 | 0.621        | 0.412        | 0.732 | 0.103 | 0.282            | -       | 0.790        | 0.338        | 0.908        | 0.252        | <b>0.017</b> | <b>0.033</b> |

482

483

484

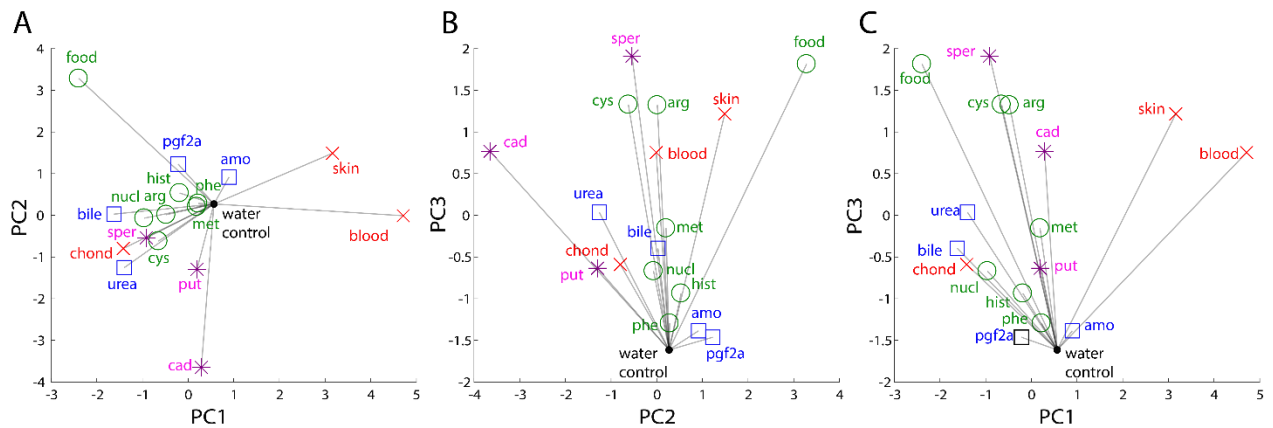

485

486 **Sup Figure 2: Representation of olfactory cues in the bidimensional spaces composed of behavioral PC1 & PC2 (A), PC2 &**  
 487 **PC3 (B) and PC1 & PC3 (C).** Grey lines indicate the distance of each odor cue to the water control (filled black dot). Food-  
 488 related cues (food extract, histidine, nucleotides, methionine, phenylalanine, cysteine and arginine) are represented by green  
 489 circles. Social-related cues (bile acids, prostaglandin 2 $\alpha$ , urea and ammonium) are represented by blue squares. Decay cues  
 490 (putrescine, spermine, cadaverine) are represented by magenta asterisks. Alarm cues (chondroitin sulfate, zebrafish blood,  
 491 zebrafish skin extract) are represented by red crosses.

492

#### 493 CONTRIBUTION

494 EY & FK designed the study. FK, LD and CW built the experimental setup. FK, JB, FP and EY developed the tracking  
 495 code. LD, CW collected the data with contribution from OU. FK analyzed the data and made the figures. FK and  
 496 EY wrote the manuscript with inputs from all authors. EY conceived the study, supervised and trained the team  
 497 members.

498

#### 499 FUNDING

500 This work was supported by NERF & V.I.B. at KU Leuven and the Kavli Institute for Systems Neuroscience at NTNU,  
 501 as well as a Fyssen foundation post-doctoral fellowship (F.K.), a Boehringer Ingelheim fellowship (C.W.), ERC  
 502 Starting Grant 335561 (E.Y.), a Norwegian Research Council FRIPRO grant 239973 (E.Y.) and a FRIPRO grant  
 503 262698 (F.K.).

504

#### 505 REFERENCES

- 506 Ahrens, M. B., Orger, M. B., Robson, D. N., Li, J. M., & Keller, P. J. (2013). Whole-brain functional imaging at cellular  
 507 resolution using light-sheet microscopy. *Nature Methods*, 10(5), 413–420. <https://doi.org/10.1038/nmeth.2434>  
 508 Barreto, R. E., Miyai, C. A., Sanches, F. H. C., Giaquinto, P. C., Delicio, H. C., & Volpato, G. L. (2013a). Blood cues induce  
 509 antipredator behavior in Nile tilapia conspecifics. *PLoS One*, 8(1), e54642.  
 510 <https://doi.org/10.1371/journal.pone.0054642>  
 511 Barreto, R. E., Miyai, C. A., Sanches, F. H. C., Giaquinto, P. C., Delicio, H. C., & Volpato, G. L. (2013b). Blood cues induce  
 512 antipredator behavior in Nile tilapia conspecifics. *PLoS One*, 8(1), e54642.  
 513 <https://doi.org/10.1371/journal.pone.0054642>  
 514 Bell, A. M., Hankison, S. J., & Laskowski, K. L. (2009). The repeatability of behaviour: A meta-analysis. *Animal Behaviour*,  
 515 77(4), 771–783. <https://doi.org/10.1016/j.anbehav.2008.12.022>  
 516 Ben-Gigirey, B., Vieites Baaptista de Sousa, J. M., Villa, T. G., & Barros-Velazquez, J. (1999). Histamine and cadaverine  
 517 production by bacteria isolated from fresh and frozen albacore (*Thunnus alalunga*). *Journal of Food Protection*,  
 518 62(8), 933–939.  
 519 Blaser, R., & Gerlai, R. (2006). Behavioral phenotyping in zebrafish: Comparison of three behavioral quantification methods.  
 520 *Behavior Research Methods*, 38(3), 456–469. <https://doi.org/10.3758/BF03192800>  
 521 Braubach, O. R., Wood, H.-D., Gadbois, S., Fine, A., & Croll, R. P. (2009). Olfactory conditioning in the zebrafish (*Danio rerio*).  
 522 *Behavioural Brain Research*, 198(1), 190–198. <https://doi.org/10.1016/j.bbr.2008.10.044>

- 523 Braun, M. H., Steele, S. L., Ekker, M., & Perry, S. F. (2009). Nitrogen excretion in developing zebrafish (*Danio rerio*): A role  
524 for Rh proteins and urea transporters. *American Journal of Physiology. Renal Physiology*, 296(5), F994–F1005.  
525 <https://doi.org/10.1152/ajprenal.90656.2008>
- 526 Burgess, H. A., & Granato, M. (2007). Modulation of locomotor activity in larval zebrafish during light adaptation. *The*  
527 *Journal of Experimental Biology*, 210(Pt 14), 2526–2539. <https://doi.org/10.1242/jeb.003939>
- 528 Derjean, D., Moussaddy, A., Atallah, E., St-Pierre, M., Auclair, F., Chang, S., ... Dubuc, R. (2010). A novel neural substrate for  
529 the transformation of olfactory inputs into motor output. *PLoS Biology*, 8(12), e1000567.  
530 <https://doi.org/10.1371/journal.pbio.1000567>
- 531 Døving, K. B., & Lastein, S. (2009). The alarm reaction in fishes—Odorants, modulations of responses, neural pathways.  
532 *Annals of the New York Academy of Sciences*, 1170, 413–423. <https://doi.org/10.1111/j.1749-6632.2009.04111.x>
- 533 Faustino, A. I., Tação-Monteiro, A., & Oliveira, R. F. (2017). Mechanisms of social buffering of fear in zebrafish. *Scientific*  
534 *Reports*, 7, 44329. <https://doi.org/10.1038/srep44329>
- 535 Fore, S., Cosacak, M. I., Verdugo, C. D., Kizil, C., & Yaksi, E. (2019). Functional properties of habenular neurons are  
536 determined by developmental stage and sequential neurogenesis. *BioRxiv*, 722462.  
537 <https://doi.org/10.1101/722462>
- 538 Friedrich, R. W., & Korsching, S. I. (1998). Chemotopic, combinatorial, and noncombinatorial odorant representations in the  
539 olfactory bulb revealed using a voltage-sensitive axon tracer. *The Journal of Neuroscience: The Official Journal of*  
540 *the Society for Neuroscience*, 18(23), 9977–9988.
- 541 Gerlai, R. (2011). Zebrafish, a Potential Novel Research Tool for the Analysis and Modeling of Anxiety. In S. Selek (Ed.),  
542 *Different Views of Anxiety Disorders*. <https://doi.org/10.5772/24100>
- 543 Gilson Volpato, & Percília Giaquinto. (2001). HUNGER SUPPRESSES THE ONSET AND THE FREEZING COMPONENT OF THE  
544 ANTIPREDATOR RESPONSE TO CONSPECIFIC SKIN EXTRACT IN PINTADO CATFISH. *Behaviour*, 138(10), 1205–1214.  
545 <https://doi.org/10.1163/15685390152822175>
- 546 Hara, T. J. (1986). Role of Olfaction in Fish Behaviour. In T. J. Pitcher (Ed.), *The Behaviour of Teleost Fishes* (pp. 152–176).  
547 [https://doi.org/10.1007/978-1-4684-8261-4\\_6](https://doi.org/10.1007/978-1-4684-8261-4_6)
- 548 Hinz, C., Namekawa, I., Namekawa, R., Behrmann-Godel, J., Oppelt, C., Jaeschke, A., ... Gerlach, G. (2013). Olfactory  
549 imprinting is triggered by MHC peptide ligands. *Scientific Reports*, 3, 2800. <https://doi.org/10.1038/srep02800>
- 550 Hussain, A., Saraiva, L. R., Ferrero, D. M., Ahuja, G., Krishna, V. S., Liberles, S. D., & Korsching, S. I. (2013). High-affinity  
551 olfactory receptor for the death-associated odor cadaverine. *Proceedings of the National Academy of Sciences of*  
552 *the United States of America*, 110(48), 19579–19584. <https://doi.org/10.1073/pnas.1318596110>
- 553 Imre, I., Di Rocco, R. T., Brown, G. E., & Johnson, N. S. (2016). Habituation of adult sea lamprey repeatedly exposed to  
554 damage-released alarm and predator cues. *Environmental Biology of Fishes*, 99(8), 613–620.  
555 <https://doi.org/10.1007/s10641-016-0503-z>
- 556 Jetli, S. K., Vendrell-Llopis, N., & Yaksi, E. (2014a). Spontaneous activity governs olfactory representations in spatially  
557 organized habenular microcircuits. *Current Biology: CB*, 24(4), 434–439.  
558 <https://doi.org/10.1016/j.cub.2014.01.015>
- 559 Jetli, S. K., Vendrell-Llopis, N., & Yaksi, E. (2014b). Spontaneous activity governs olfactory representations in spatially  
560 organized habenular microcircuits. *Current Biology: CB*, 24(4), 434–439.  
561 <https://doi.org/10.1016/j.cub.2014.01.015>
- 562 Johnson, B. N., & Sobel, N. (2007). Methods for building an olfactometer with known concentration outcomes. *Journal of*  
563 *Neuroscience Methods*, 160(2), 231–245. <https://doi.org/10.1016/j.jneumeth.2006.09.008>
- 564 Kaniganti, T., Deogade, A., Maduskar, A., Mukherjee, A., Guru, A., Subhedar, N., & Ghose, A. (2019). Sensitivity of Olfactory  
565 Sensory Neurons to food cues is tuned to nutritional states by Neuropeptide Y signalling. *BioRxiv*, 573170.  
566 <https://doi.org/10.1101/573170>
- 567 Keller-Costa, T., Canário, A. V. M., & Hubbard, P. C. (2015). Chemical communication in cichlids: A mini-review. *General and*  
568 *Comparative Endocrinology*, 221, 64–74. <https://doi.org/10.1016/j.ygcen.2015.01.001>
- 569 Kermen, F., Chakirian, A., Sezille, C., Jousain, P., Le Goff, G., Ziessel, A., ... Bensafi, M. (2011). Molecular complexity  
570 determines the number of olfactory notes and the pleasantness of smells. *Scientific Reports*, 1, 206.  
571 <https://doi.org/10.1038/srep00206>
- 572 Kermen, Florence, Franco, L. M., Wyatt, C., & Yaksi, E. (2013). Neural circuits mediating olfactory-driven behavior in fish.  
573 *Frontiers in Neural Circuits*, 7, 62. <https://doi.org/10.3389/fncir.2013.00062>
- 574 Kermen, Florence, Midroit, M., Kuczewski, N., Forest, J., Thévenet, M., Sacquet, J., ... Mandairon, N. (2016). Topographical  
575 representation of odor hedonics in the olfactory bulb. *Nature Neuroscience*, 19(7), 876–878.  
576 <https://doi.org/10.1038/nn.4317>
- 577 Kermen, Florence, & Yaksi, E. (2019). Interhemispheric connections between olfactory bulbs improve odor detection.  
578 *BioRxiv*, 767210. <https://doi.org/10.1101/767210>
- 579 Koide, T., Miyasaka, N., Morimoto, K., Asakawa, K., Urasaki, A., Kawakami, K., & Yoshihara, Y. (2009). Olfactory neural  
580 circuitry for attraction to amino acids revealed by transposon-mediated gene trap approach in zebrafish.  
581 *Proceedings of the National Academy of Sciences of the United States of America*, 106(24), 9884–9889.  
582 <https://doi.org/10.1073/pnas.0900470106>
- 583 Lindsay, S. M., & Vogt, R. G. (2004). Behavioral responses of newly hatched zebrafish (*Danio rerio*) to amino acid  
584 chemostimulants. *Chemical Senses*, 29(2), 93–100. <https://doi.org/10.1093/chemse/bjh009>

- 585 Mann, K. D., Turnell, E. R., Atema, J., & Gerlach, G. (2003). Kin Recognition in Juvenile Zebrafish (*Danio rerio*) Based on  
586 Olfactory Cues. *The Biological Bulletin*, 205(2), 224–225. <https://doi.org/10.2307/1543264>
- 587 Mathuru, A. S., Kibat, C., Cheong, W. F., Shui, G., Wenk, M. R., Friedrich, R. W., & Jesuthasan, S. (2012). Chondroitin  
588 fragments are odorants that trigger fear behavior in fish. *Current Biology: CB*, 22(6), 538–544.  
589 <https://doi.org/10.1016/j.cub.2012.01.061>
- 590 Mirat, O., Sternberg, J. R., Severi, K. E., & Wyart, C. (2013). ZebraZoom: An automated program for high-throughput  
591 behavioral analysis and categorization. *Frontiers in Neural Circuits*, 7, 107.  
592 <https://doi.org/10.3389/fncir.2013.00107>
- 593 Miyasaka, N., Arganda-Carreras, I., Wakisaka, N., Masuda, M., Sümbül, U., Seung, H. S., & Yoshihara, Y. (2014). Olfactory  
594 projectome in the zebrafish forebrain revealed by genetic single-neuron labelling. *Nature Communications*, 5(1).  
595 <https://doi.org/10.1038/ncomms4639>
- 596 Muto, A., & Kawakami, K. (2013). Prey capture in zebrafish larvae serves as a model to study cognitive functions. *Frontiers in*  
597 *Neural Circuits*, 7, 110. <https://doi.org/10.3389/fncir.2013.00110>
- 598 Nakamura I, Watanabe YY, Papastamatiou YP, Sato K, & Meyer CG. (2011). Yo-yo vertical movements suggest a foraging  
599 strategy for tiger sharks *Galeocerdo cuvier*. *Marine Ecology Progress Series*, 424, 237–246.
- 600 Øverli, Ø., Sørensen, C., Pulman, K. G. T., Pottinger, T. G., Korzan, W., Summers, C. H., & Nilsson, G. E. (2007). Evolutionary  
601 background for stress-coping styles: Relationships between physiological, behavioral, and cognitive traits in non-  
602 mammalian vertebrates. *Neuroscience and Biobehavioral Reviews*, 31(3), 396–412.  
603 <https://doi.org/10.1016/j.neubiorev.2006.10.006>
- 604 Pedroso, G. L., Hammes, T. O., Escobar, T. D. C., Fracasso, L. B., Forgiarini, L. F., & da Silveira, T. R. (2012). Blood collection  
605 for biochemical analysis in adult zebrafish. *Journal of Visualized Experiments: JoVE*, (63), e3865.  
606 <https://doi.org/10.3791/3865>
- 607 Pfeiffer, W. (1963). Alarm substances. *Experientia*, 19, 113–123. <https://doi.org/10.1007/bf02171582>
- 608 Savoca, M. S., Tyson, C. W., McGill, M., & Slager, C. J. (2017). Odours from marine plastic debris induce food search  
609 behaviours in a forage fish. *Proceedings. Biological Sciences*, 284(1860). <https://doi.org/10.1098/rspb.2017.1000>
- 610 Semmelhack, J. L., & Wang, J. W. (2009). Select *Drosophila glomeruli* mediate innate olfactory attraction and aversion.  
611 *Nature*, 459(7244), 218–223. <https://doi.org/10.1038/nature07983>
- 612 Sorensen, P. W., Hara, T. J., Stacey, N. E., & Goetz, F. W. (1988). F prostaglandins function as potent olfactory stimulants  
613 that comprise the postovulatory female sex pheromone in goldfish. *Biology of Reproduction*, 39(5), 1039–1050.  
614 <https://doi.org/10.1095/biolreprod39.5.1039>
- 615 Sorensen, Peter W., Fine, J. M., Dvornikovs, V., Jeffrey, C. S., Shao, F., Wang, J., ... Hoyer, T. R. (2005). Mixture of new  
616 sulfated steroids functions as a migratory pheromone in the sea lamprey. *Nature Chemical Biology*, 1(6), 324–328.  
617 <https://doi.org/10.1038/nchembio739>
- 618 Souza-Bastos, L. R. de, Freire, C. A., & Fernandes-de-Castilho, M. (2014). Skin extract from Rhamdia quelen (Siluriformes:  
619 Heptapteridae) does not promote stress in conspecifics. *Neotropical Ichthyology*, 12, 125–132.
- 620 Steck, K., Veit, D., Grandy, R., Badia, S. B. i, Mathews, Z., Verschure, P., ... Knaden, M. (2012). A high-throughput behavioral  
621 paradigm for *Drosophila* olfaction—The Flywalk. *Scientific Reports*, 2, 361.
- 622 Umeda, K., & Shoji, W. (2017). From neuron to behavior: Sensory-motor coordination of zebrafish turning behavior.  
623 *Development, Growth & Differentiation*, 59(3), 107–114. <https://doi.org/10.1111/dgd.12345>
- 624 v. Frisch, K. (1942). Über einen Schreckstoff der Fischhaut und seine biologische Bedeutung. *Zeitschrift Für Vergleichende*  
625 *Physiologie*, 29(1), 46–145. <https://doi.org/10.1007/BF00304445>
- 626 Vitebsky, A., Reyes, R., Sanderson, M. J., Michel, W. C., & Whitlock, K. E. (2005). Isolation and characterization of the laure  
627 olfactory behavioral mutant in the zebrafish, *Danio rerio*. *Developmental Dynamics: An Official Publication of the*  
628 *American Association of Anatomists*, 234(1), 229–242. <https://doi.org/10.1002/dvdy.20530>
- 629 Wagner, C. M., Stroud, E. M., & Meckley, T. D. (2011). A deathly odor suggests a new sustainable tool for controlling a costly  
630 invasive species. *Canadian Journal of Fisheries and Aquatic Sciences*, 68(7), 1157–1160.  
631 <https://doi.org/10.1139/f2011-072>
- 632 Wakisaka, N., Miyasaka, N., Koide, T., Masuda, M., Hiraki-Kajiyama, T., & Yoshihara, Y. (2017). An Adenosine Receptor for  
633 Olfaction in Fish. *Current Biology: CB*, 27(10), 1437–1447.e4. <https://doi.org/10.1016/j.cub.2017.04.014>
- 634 Yabuki, Y., Koide, T., Miyasaka, N., Wakisaka, N., Masuda, M., Ohkura, M., ... Yoshihara, Y. (2016). Olfactory receptor for  
635 prostaglandin F2 $\alpha$  mediates male fish courtship behavior. *Nature Neuroscience*, 19(7), 897–904.  
636 <https://doi.org/10.1038/nn.4314>
- 637 Yaksi, E., Judkewitz, B., & Friedrich, R. W. (2007). Topological reorganization of odor representations in the olfactory bulb.  
638 *PLoS Biology*, 5(7), e178. <https://doi.org/10.1371/journal.pbio.0050178>
- 639 Yaksi, E., von Saint Paul, F., Niessing, J., Bundschuh, S. T., & Friedrich, R. W. (2009). Transformation of odor representations  
640 in target areas of the olfactory bulb. *Nature Neuroscience*, 12(4), 474–482. <https://doi.org/10.1038/nn.2288>
- 641 Zhao, X., & Chivers, D. P. (2005). Response of juvenile goldfish (*Carassius auratus*) to chemical alarm cues: Relationship  
642 between response intensity, response duration, and the level of predation risk. In R. T. Mason, M. P. LeMaster, &  
643 D. Müller-Schwarze (Eds.), *Chemical Signals in Vertebrates 10* (pp. 334–341). Boston, MA: Springer US.  
644
